# Supplementary material for: Plant Genetic Archaeology: Whole-Genome Sequencing Reveals the Pedigree of a Classical Trisomic Line
Source: PubMed Central journal article supplement (PMC4321033; doi:10.1534/g3.114.015156), 2014-12-18
Supplement: supp_g3.114.015156_015156SI.pdf [file supp_g3.114.015156_015156SI.pdf]

**Plant genomic archaeology: whole-genome sequencing reveals the pedigree of a classical trisomic line**

Patrice A. Salomé<sup>1,2</sup> and Detlef Weigel

Department of Molecular Biology, Max Planck Institute for Developmental Biology, Spemannstraße 37-39, D-72076 Tübingen, D-72076 Tübingen, Germany

<sup>1</sup> Corresponding author. Email: [salome@chem.ucla.edu](mailto:salome@chem.ucla.edu)

<sup>2</sup> Current address: UCLA, Department of Chemistry and Biochemistry, 607 Charles E. Young Drive East, Los Angeles, CA 90095, USA

**DOI: 10.1534/g3.114.015156**

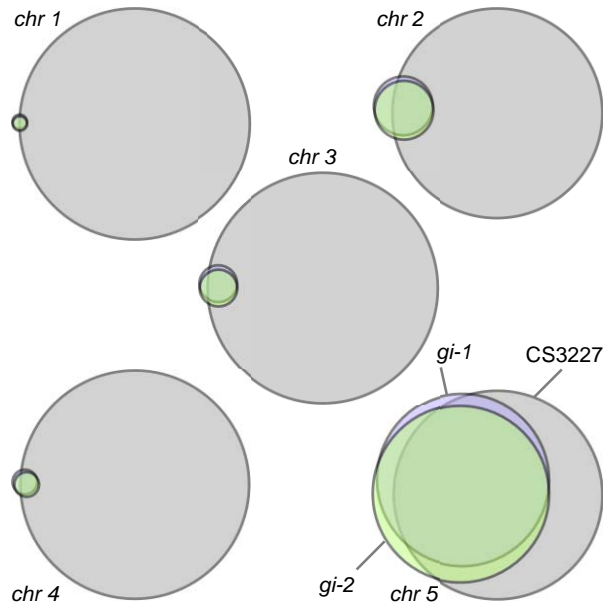

**Figure S1 SNP frequency in *gi-1*, *gi-2* and CS3227.**

Scaled Venn diagrams for SNP number in the genotypes *gi-1*, *gi-2* and CS3227 for each of the five *Arabidopsis* chromosomes. Note that diagram areas between chromosomes should not be compared, as scaling was not applied between chromosomes. Number of SNPs for each genotype is given in Table 3.

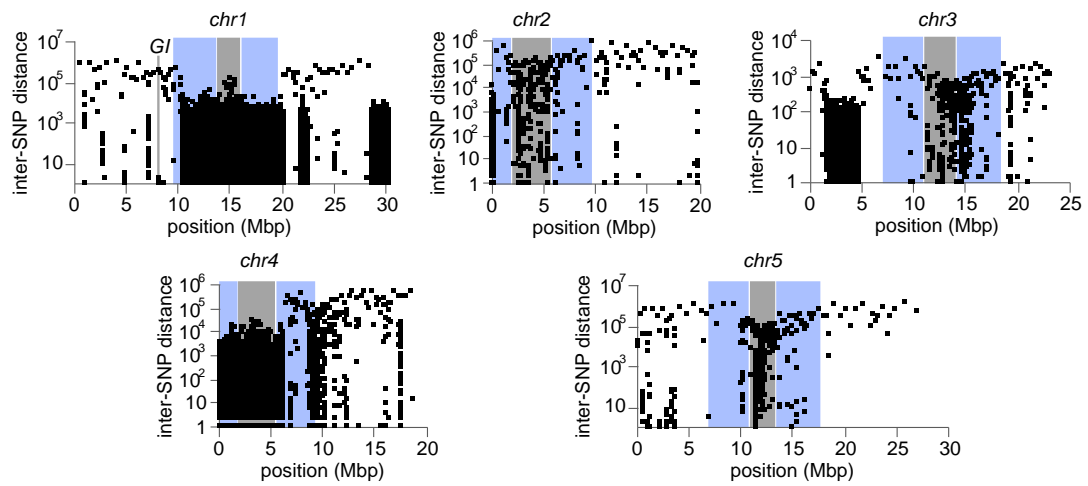

**Figure S2 SNP distribution in CS3227 is not random.**

Inter-SNP distance between consecutive SNPs is plotted as a function of the mid-position between consecutive SNPs. Clear haplotype blocks appear along all CS3227 chromosomes, with the exception of chromosome 5, which also exhibits the lowest SNP count for this genotype.

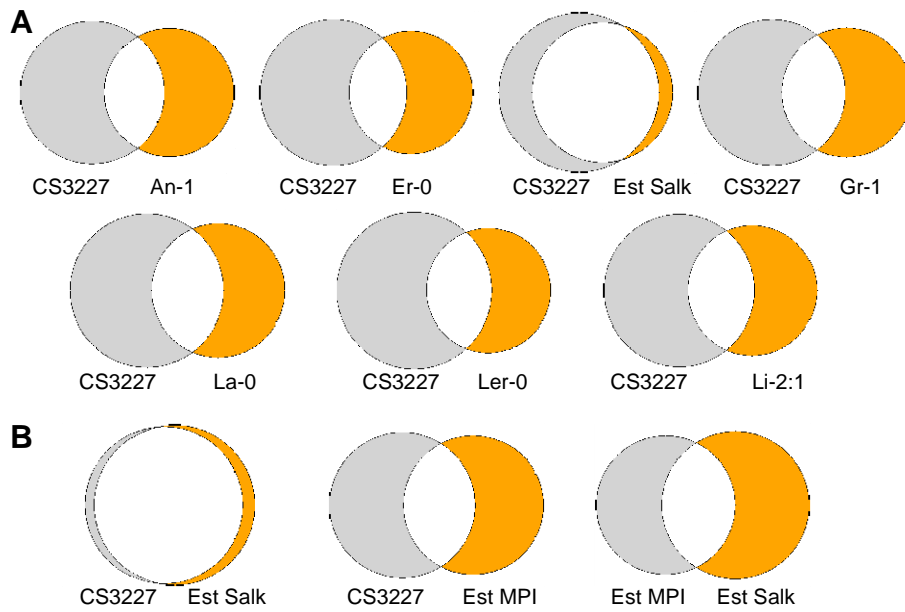

**Figure S3 SNP sharing between chosen accessions and CS3227.** Note SNP numbers are not corrected for the unsequenced portion of the compared genomes. All SNP data downloaded from 1001genomes.org on August 2013.

- A.** SNP sharing between CS3227 and accessions An-1, Er-0, Est, Gr-1, La-0, Ler-0 and Li-2:1 used by George Redeí, for the interval 10-20 Mbp of chromosome 1.
- B.** SNP sharing between CS3227 and Est accessions (from Salk, CS 67485, or MPI, CS22683), for, after re-sequencing as PCR-free DNA Truseq libraries. Note that SNP numbers are not corrected for the unmapped portion of the compared genomes.

**Tables S1-S5**

Available for download at <http://www.g3journal.org/lookup/suppl/doi:10.1534/g3.114.015156/-/DC1>

**Table S1. SNP data for CS3227.**

**Table S2. SNP data for EstMPI.**

**Table S3. SNP data for EstSalk.**

**Table S4. SNP data for *gi-1*.**

**Table S5. SNP data for *gi-2*.**

Tables S1-S5 are provided in Shore output format:

Genotype

Chromosome: chromosome identifier

Position: position of a base in the reference sequence

Reference: nucleotide found in Col-0

Non-reference: nucleotide (or deletion) in the sequenced genome

Quality: Highest base quality supporting the base change, between 0-40. Cut-off was chosen >25.

Support: Number of reads supporting the base change

Concordance: concordance of all short reads overlapping the position

Copy: copy number of the target sequence
