# Supplementary material for: Plant Genetic Archaeology: Whole-Genome Sequencing Reveals the Pedigree of a Classical Trisomic Line
Source: PubMed Central journal article supplement (PMC4321033; doi:10.1534/g3.114.015156), 2014-12-18
Supplement: supp_g3.114.015156_FigureS1.pdf [file supp_g3.114.015156_FigureS1.pdf]

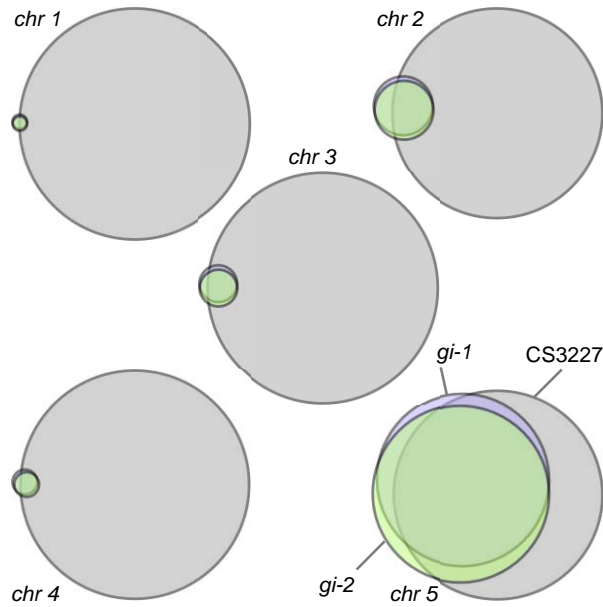

**Figure S1 SNP frequency in *gi-1*, *gi-2* and CS3227.**

Scaled Venn diagrams for SNP number in the genotypes *gi-1*, *gi-2* and CS3227 for each of the five *Arabidopsis* chromosomes. Note that diagram areas between chromosomes should not be compared, as scaling was not applied between chromosomes. Number of SNPs for each genotype is given in Table 3.
