# Supplementary material for: Plant Genetic Archaeology: Whole-Genome Sequencing Reveals the Pedigree of a Classical Trisomic Line
Source: PubMed Central journal article supplement (PMC4321033; doi:10.1534/g3.114.015156), 2014-12-18
Supplement: supp_g3.114.015156_FigureS2.pdf [file supp_g3.114.015156_FigureS2.pdf]

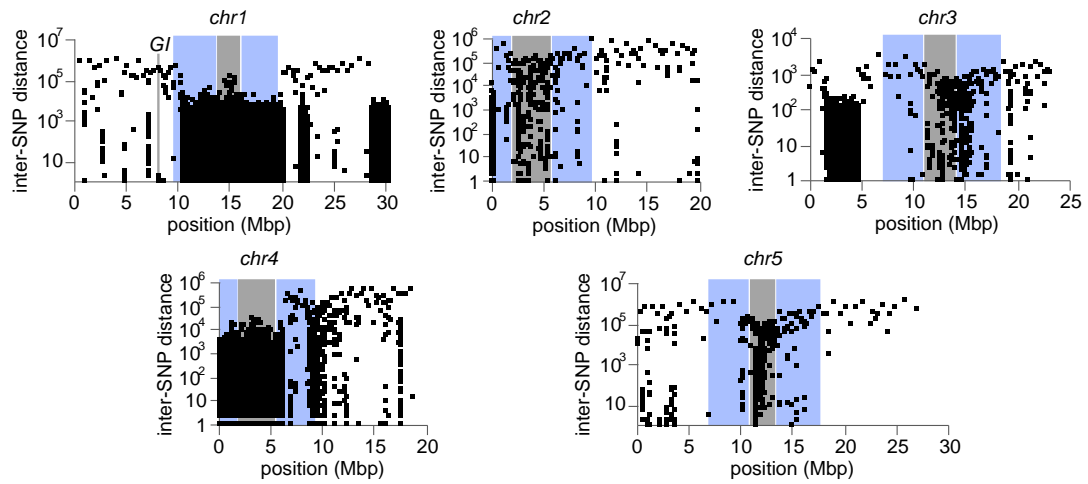

**Figure S2 SNP distribution in CS3227 is not random.**

Inter-SNP distance between consecutive SNPs is plotted as a function of the mid-position between consecutive SNPs. Clear haplotype blocks appear along all CS3227 chromosomes, with the exception of chromosome 5, which also exhibits the lowest SNP count for this genotype.
